# Supplementary material
Source: HighWire-hosted journal article supplement (http://www.qdcxjkg.com/highwire/filestream/113591/field_highwire_adjunct_files/0/table_3.pdf)
Supplement: table_3.pdf [file table_3.pdf]

Table S3. Long-term medication according to severity of OSA.

|                                 | All patients | No OSA   | Mild OSA | Moderate OSA | Severe OSA |
|---------------------------------|--------------|----------|----------|--------------|------------|
|                                 | N = 82       | N = 12   | N = 23   | N = 23       | N =24      |
| Any AHT                         | 74 (90%)     | 10 (83%) | 19 (83%) | 22 (96%)     | 23 (96%)   |
| Beta-blocker                    | 47 (57%)     | 5 (42%)  | 13 (57%) | 15 (65%)     | 14 (58%)   |
| ACE-inhibitor or<br>ATR-blocker | 49 (60%)     | 7 (58%)  | 13 (57%) | 13 (57%)     | 16 (67%)   |
| 3 or more AHT                   | 18 (22%)     | 3 (25%)  | 6 (26%)  | 4 (17%)      | 5 (21%)    |
| Statins                         | 51 (62%)     | 6 (50%)  | 13 (57%) | 18 (78%)     | 14 (58%)   |
| Any anti-coagulant              | 71 (87%)     | 11 (92%) | 19 (83%) | 21 (91%)     | 20 (83%)   |
| ASA                             | 65 (80%)     | 9 (75%)  | 17 (74%) | 21 (91%)     | 18 (75%)   |
| Clopidogrel                     | 12 (17%)     | 3 (25%)  | 4 (17%)  | 3 (13%)      | 2 (8%)     |
| Warfarin                        | 4 (5%)       | 0 (0%)   | 2 (9%)   | 0 (0%)       | 2 (8%)     |
| Opiates                         | 15 (18%)     | 2 (17%)  | 3 (13%)  | 5 (22%)      | 5 (21%)    |
| Benzodiazepines                 | 12 (15%)     | 4 (33%)  | 3 (13%)  | 2 (9%)       | 3 (13%)    |

Data are number (percentage) of patients. Abbreviations: ACE = Angiotensin-converting enzyme

AHT = Anti-hypertensive, ASA = Acetylsalicylic acid, ATR = Angiotensin receptor,

Significance between all groups was calculated with exact Chi-square.

P = Not significant for all.
